# Supplementary material for: Image-localized biopsy mapping of brain tumor heterogeneity: A single-center study protocol
Source: bioRxiv or medRxiv preprint supplement (doi:10.1101/2022.11.14.22282304), 2023-06-02
Supplement: Supplementary file [file media-1.pdf]

SUPPLEMENTARY MATERIAL

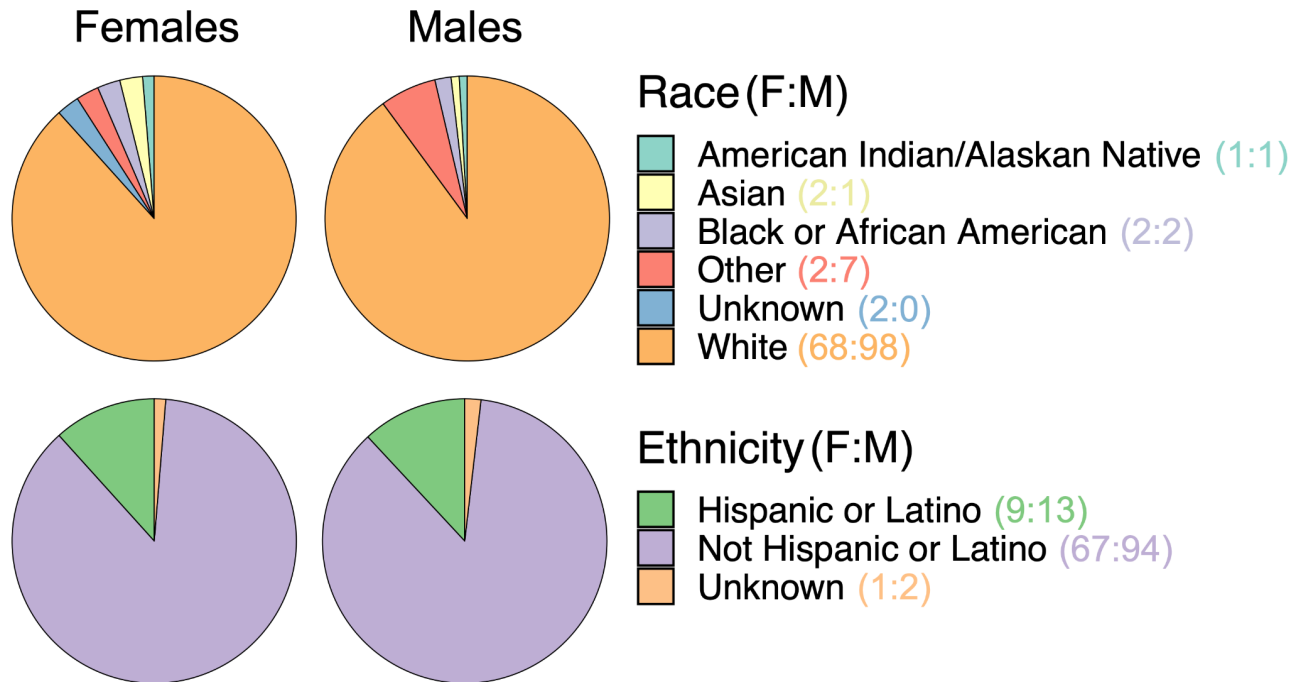

Supplementary Figure 1: Self-reported race and ethnicity broken down by self-reported sex of patients. Each sex consists predominantly of patients who identified as white, and patients who identified as not hispanic/latino.

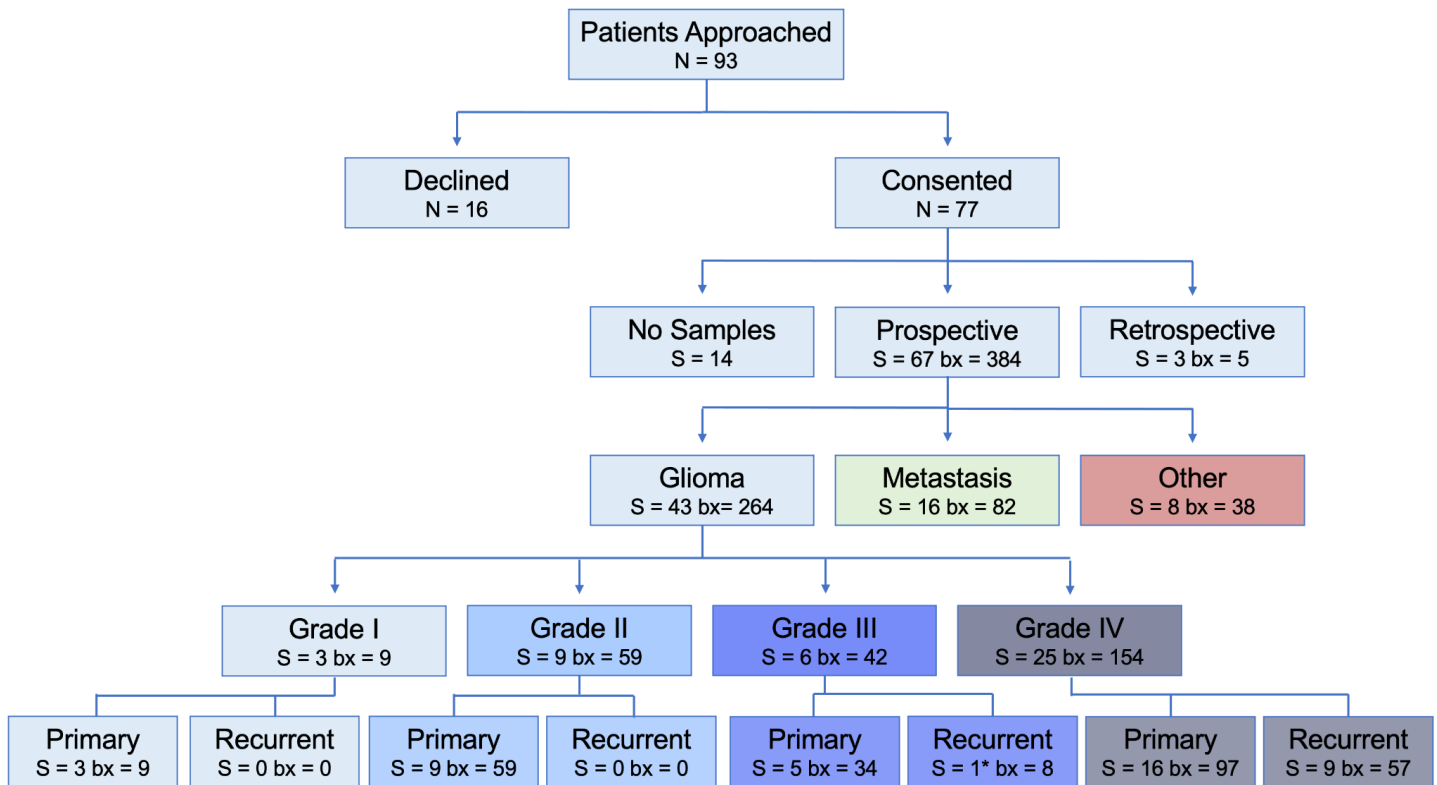

Supplemental Figure 2: The breakdown of patients approached and consented, as well as tumor type, grade and treatment status for patients who self-identified as female. \*One case included in the recurrent grade III group underwent a grade transformation.

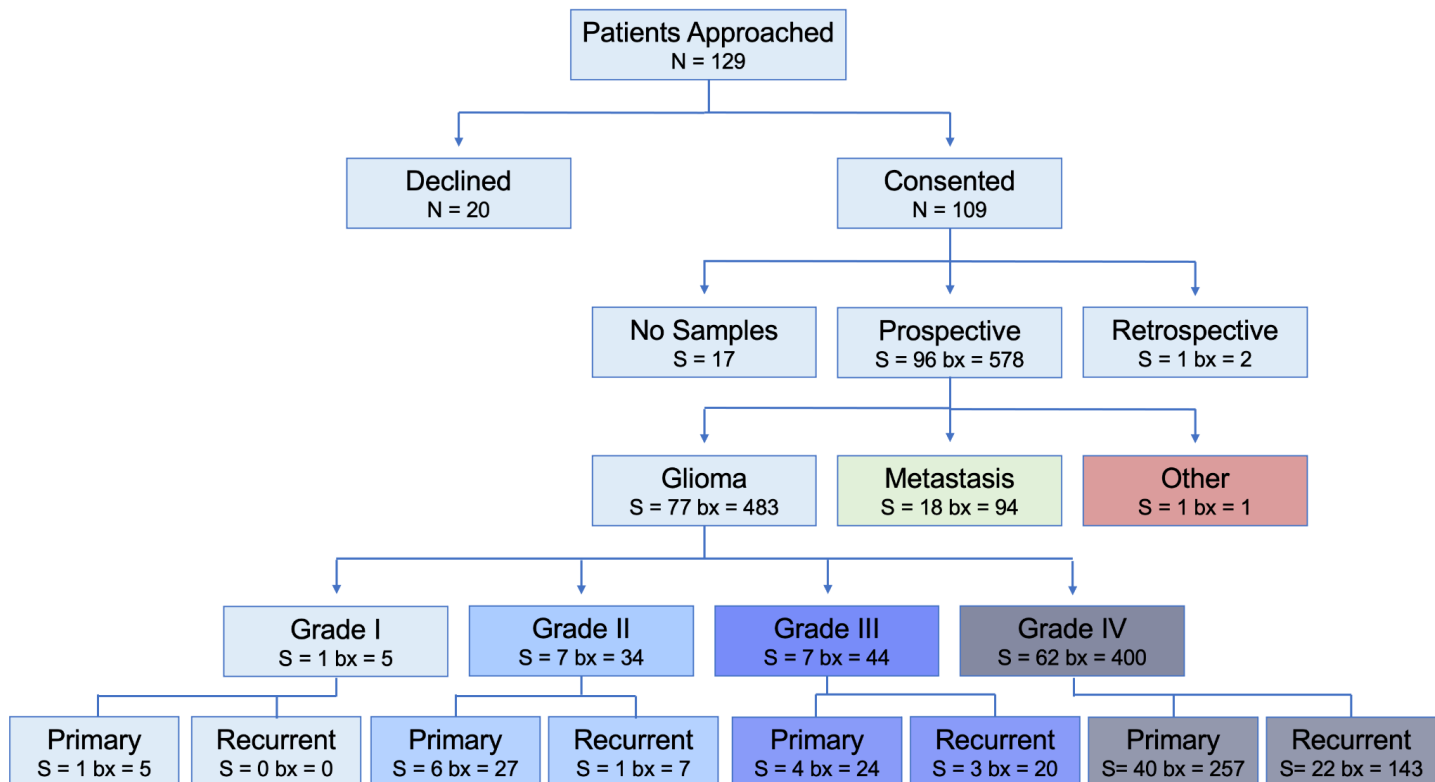

Supplemental Figure 3: The breakdown of patients approached and consented, as well as tumor type, grade and treatment status for patients who self-identified as male.

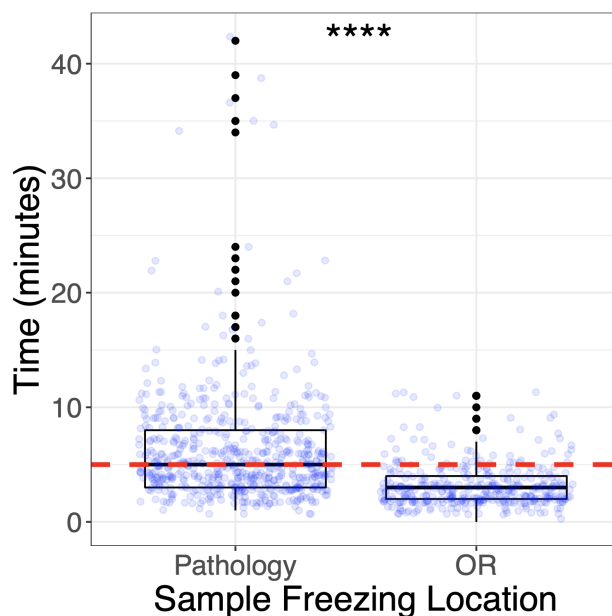

Supplemental Figure 4: We have tracked the time from extraction to freezing for 973/995 samples. Switching from flash-freezing in pathology (N=596) to inside the operating room (OR, N=377) has allowed us to significantly reduce time between surgical extraction and freezing (linear mixed effects model with surgery ID as a nested random variable,  $p < 0.0001$ ). In doing so, we reach the goal of freezing biopsies in a 5-minute window (red dashed line) more consistently.
